# Supplementary material for: Identification of Target Genes at Juvenile Idiopathic Arthritis GWAS Loci in Human Neutrophils
Source: PubMed Central journal article supplement (PMC6445851; doi:10.3389/fgene.2019.00181), 2019-03-27
Supplement: Data_Sheet_1.pdf [file Data_Sheet_1.pdf]

# Identification of Target Genes at Juvenile Idiopathic Arthritis GWAS Loci in Human Neutrophils

Junyi Li, Xiucheng Yuan, Michael E. March, Xueming Yao, Yan Sun, Xiao Chang, Hakon Hakonarson, Qianghua Xia, Xinyi Meng, Jin Li

## Supplementary Material

**Supplementary Figure 1.** JIA SNPs and target genes located in the same topologically associating domains (TAD).

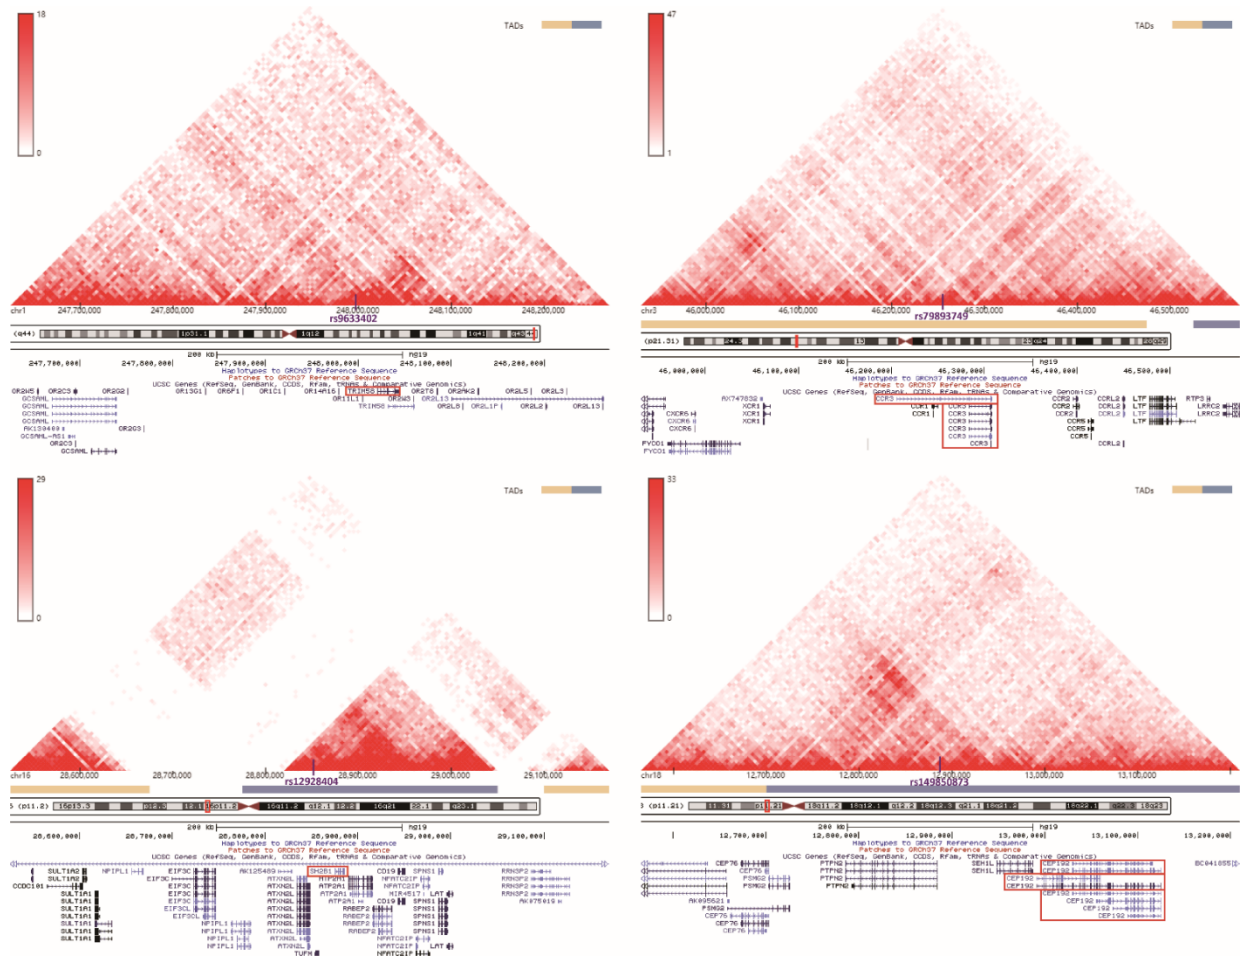

**Supplementary Figure 2.** Circos plots of chromatin interactions between JIA SNPs and target genes.

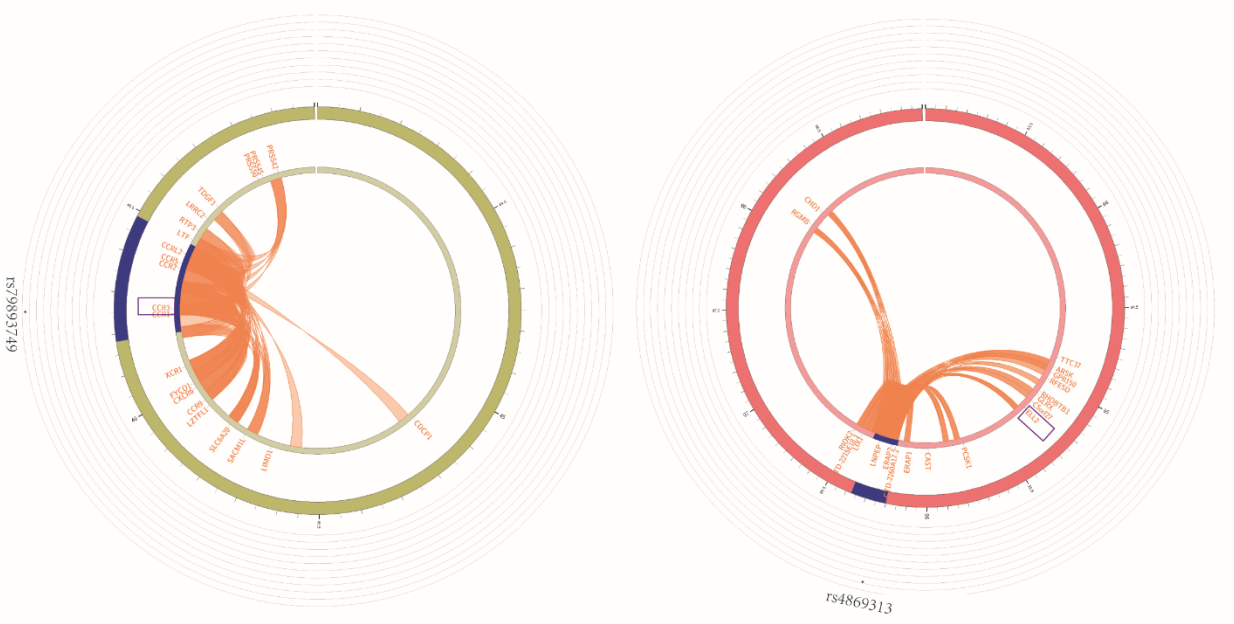

**Supplementary Figure 3.** PPI network of first-order interactions constructed for JIA loci target genes in PBMC.

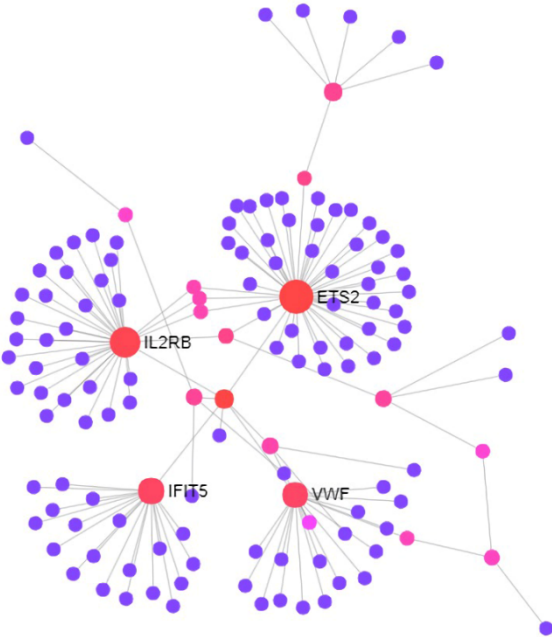

**Supplementary Table 1.** Summary of JIA GWAS loci targeted genes in PBMC

| SNP        | Chr | Pos (hg19) | Gene            | GWAS_Pval | GTEEx_Pval | DEG_PFP  | DEG_FC |
|------------|-----|------------|-----------------|-----------|------------|----------|--------|
| rs9633402  | 1   | 247946160  | <i>TRIM58</i>   | 3.E-06    | 5.4E-04    | 6.70E-04 | 1.32   |
| rs9633402  | 1   | 247946160  | <i>ZNF124</i>   | 3.E-06    | 1.5E-02    | 1.77E-03 | -1.32  |
| rs2075184  | 2   | 103080592  | <i>IL18RAP</i>  | 9.E-08    | 5.0E-34    | 8.30E-04 | -1.42  |
| rs2075184  | 2   | 103080592  | <i>IL18R1</i>   | 9.E-08    | 1.0E-04    | 7.76E-03 | -1.33  |
| rs4676410  | 2   | 241563739  | <i>FARP2</i>    | 2.E-07    | 1.8E-02    | 9.14E-03 | -1.24  |
| rs4625     | 3   | 49572140   | <i>IP6K1</i>    | *8.E-11   | 8.5E-03    | 2.68E-03 | 1.26   |
| rs11741255 | 5   | 131811182  | <i>SLC22A4</i>  | *2.E-09   | 2.3E-02    | 5.56E-03 | 1.24   |
| rs2395148  | 6   | 32321554   | <i>HLA-DQB1</i> | *2.E-10   | 2.3E-03    | 3.33E-02 | -1.28  |
| rs41291794 | 6   | 32425762   | <i>HLA-DPBI</i> | *4.E-15   | 2.1E-03    | 8.19E-04 | -1.37  |
| rs481331   | 10  | 43003048   | <i>ZNF33B</i>   | 1.E-06    | 1.7E-12    | 1.36E-03 | -1.33  |
| rs7069750  | 10  | 90762376   | <i>IFIT5</i>    | *3.E-08   | 1.6E-04    | 2.80E-03 | 1.2    |
| rs10849448 | 12  | 6493351    | <i>VWF</i>      | *5.E-09   | 4.8E-02    | 1.64E-05 | 1.35   |
| rs12598357 | 16  | 28340945   | <i>APOBR</i>    | *4.E-09   | 3.7E-03    | 1.08E-02 | 1.22   |
| rs2836882  | 21  | 40466570   | <i>ETS2</i>     | 5.E-08    | 2.3E-08    | 6.85E-03 | -1.27  |
| rs10084630 | 22  | 37679487   | <i>IL2RB</i>    | 9.E-06    | 5.8E-03    | 7.75E-03 | -1.31  |

*SNP* = single nucleotide polymorphism; *Chr* = chromosome; *Pos (hg19)* = position on human genome build hg19; *Gene* = likely targeted gene at each GWAS locus; *GWAS\_Pval* = P-value of each SNP in GWAS analyses extracted from GWAS catalog; *GTEEx\_Pval* = P-value of correlation between gene expression level and GWAS SNP genotype in GTEEx database; *DEG\_PFP* = the probability of being false positive for the differentially expressed gene in the microarray analysis; *DEG\_FC* = fold change of the differentially expressed gene in a microarray analysis; \**GWAS\_Pval* < 5.E-08.

**Supplementary Table 2.** KEGG pathways enriched in the PPI network formed by JIA loci target gene and their interactors in PBMC (FDR<0.05).

| Pathway                                 | Total | Expected | Hits | P-Value  | FDR      |
|-----------------------------------------|-------|----------|------|----------|----------|
| Jak-STAT signaling pathway              | 99    | 1.92     | 20   | 8.74E-16 | 1.90E-13 |
| Measles                                 | 102   | 1.98     | 16   | 5.35E-11 | 5.81E-09 |
| HTLV-I infection                        | 199   | 3.87     | 19   | 4.57E-09 | 3.31E-07 |
| Pathways in cancer                      | 310   | 6.03     | 20   | 1.25E-06 | 6.78E-05 |
| Acute myeloid leukemia                  | 57    | 1.11     | 8    | 1.14E-05 | 0.000493 |
| Osteoclast differentiation              | 119   | 2.31     | 11   | 1.53E-05 | 0.000555 |
| Prostate cancer                         | 87    | 1.69     | 9    | 3.94E-05 | 0.00122  |
| Renal cell carcinoma                    | 60    | 1.17     | 7    | 0.000139 | 0.0036   |
| Herpes simplex infection                | 103   | 2        | 9    | 0.000149 | 0.0036   |
| ErbB signaling pathway                  | 87    | 1.69     | 8    | 0.000249 | 0.00541  |
| Pancreatic cancer                       | 69    | 1.34     | 7    | 0.000337 | 0.00615  |
| Epstein-Barr virus infection            | 91    | 1.77     | 8    | 0.00034  | 0.00615  |
| Chronic myeloid leukemia                | 73    | 1.42     | 7    | 0.000478 | 0.00798  |
| Influenza A                             | 107   | 2.08     | 8    | 0.00101  | 0.0157   |
| Dorso-ventral axis formation            | 12    | 0.233    | 3    | 0.00138  | 0.0199   |
| Focal adhesion                          | 200   | 3.89     | 11   | 0.00155  | 0.021    |
| Wnt signaling pathway                   | 144   | 2.8      | 9    | 0.00176  | 0.0222   |
| Tuberculosis                            | 174   | 3.38     | 10   | 0.00184  | 0.0222   |
| Bladder cancer                          | 29    | 0.564    | 4    | 0.00219  | 0.025    |
| Colorectal cancer                       | 49    | 0.953    | 5    | 0.00242  | 0.0262   |
| Leishmaniasis                           | 51    | 0.992    | 5    | 0.00289  | 0.0294   |
| Hepatitis C                             | 100   | 1.94     | 7    | 0.00307  | 0.0294   |
| B cell receptor signaling pathway       | 75    | 1.46     | 6    | 0.00314  | 0.0294   |
| Cytokine-cytokine receptor interaction  | 253   | 4.92     | 12   | 0.00331  | 0.0294   |
| Chemokine signaling pathway             | 189   | 3.68     | 10   | 0.00339  | 0.0294   |
| Transcriptional misregulation in cancer | 19    | 0.369    | 3    | 0.0055   | 0.0459   |

*Total = the total number of genes in each pathway; Expected = the expected number of genes in each pathway given the number of JIA target genes; Hits = the actual number of JIA target genes fall into each pathway; P-value = P-value of each pathway in enrichment test; FDR = false discovery rate of each pathway.*
